# Supplementary material for: Disentangling an avian assemblages’ evolutionary and functional history in a Chihuahuan desert city
Source: Springer Nature journal article supplement (doi:10.1007/s11252-019-00864-8), 2019-05-23
Supplement: MOESM3 [file 16746412]

**Table S2.** GenBank accession numbers of genetic markers for each species. NA = Not available.

| Species | CYTB | COI | ND2 | ND3 | RAG1 | FGB5 | FGB7 | MYO2 |
| --- | --- | --- | --- | --- | --- | --- | --- | --- |
| *Struthio camelus* | U76055 | Y12025 | Y12025 | Y12025 | AF143727 | NA | AY082424 | EU739904 |
| *Tinamus major* | NC_002781 | JQ176493 | NC_002781 | NC_002781 | NA | NA | NA | NA |
| *Anser caerulescens* | X75772 | DQ433498 | NA | NA | NA | NA | JQ255529 | NA |
| *Anser rossii* | EU914156 | DQ434538 | EU585683 | NA | NA | NA | NA | NA |
| *Branta hutchinsii* | AY072592 | DQ434479 | NA | NA | NA | NA | NA | NA |
| *Branta canadensis* | NC_007011 | DQ433374 | EU585692 | NC_007011 | NA | NA | NA | NA |
| *Aix sponsa* | AF059053 | AY666569 | AF059114 | NA | NA | NA | NA | NA |
| *Spatula discors* | EU914146 | AY666323 | AF059128 | NA | NA | NA | NA | NA |
| *Spatula cyanoptera* | EU914155 | DQ433311 | AF059126 | NA | NA | NA | GQ269604 | NA |
| *Spatula clypeata* | EU914154 | DQ434273 | AF059174 | NC_028346 | NA | NA | KJ822618 | NA |
| *Mareca strepera* | EU574791 | GQ481327 | AF059169 | NA | AF143729 | NA | JQ180788 | NA |
| *Mareca americana* | AF059103 | DQ433309 | HM776961 | NA | NA | NA | KJ824431 | NA |
| *Anas platyrhynchos* | EU585609 | JF499088 | AF059142 | NC_009684 | HQ902532 | EU739196 | EF552750 | EU739906 |
| *Anas acuta* | EU914148 | EF515735 | NC_024631 | NC_024631 | NA | NA | KJ821121 | NA |
| *Anas crecca* | EU585607 | DQ434281 | HM640786 | NC_022452 | NA | NA | JX137879 | NA |
| *Aythya valisineria* | NA | DQ434336 | NA | NA | NA | NA | NA | NA |
| *Aythya americana* | AF090337 | DQ434316 | NC_000877 | AF090337 | NA | NA | EU739370 | EU739923 |
| *Aythya collaris* | NA | DQ434324 | NA | NA | NA | NA | AY082414 | NA |
| *Aythya affinis* | EU585621 | DQ434307 | EU585684 | NA | NA | NA | AY082412 | NA |
| *Bucephala albeola* | EU585633 | DQ432777 | EU585696 | NA | NA | NA | NA | NA |
| *Lophodytes cucullatus* | EU585650 | DQ434635 | EU585713 | NA | NA | NA | NA | NA |
| *Mergus merganser* | EU585654 | DQ434670 | EU585717 | NA | NA | NA | JQ777352 | NA |
| *Oxyura jamaicensis* | AY747860 | AY666448 | EU585721 | NA | NA | EU739288 | EU739453 | EU740002 |
| *Callipepla squamata* | NC_029340 | DQ432806 | KR732838 | NC_029340 | NA | NA | NA | NA |
| *Callipepla gambelii* | DQ485889 | DQ433415 | KR732835 | NA | NA | NA | DQ494145 | NA |
| *Podilymbus podiceps* | EU167015 | DQ433969 | EU166972 | AF076369 | NA | NA | AY695145 | KJ400340 |
| *Podiceps nigricollis* | EU167016 | GQ482520 | EU166973 | AF076375 | NA | NA | NA | NA |
| *Aechmophorus occidentalis* | AY567919 | DQ433284 | NA | AY567933 | NA | NA | NA | NA |
| *Columba livia* | GU908131 | GQ481606 | KJ455388 | GU908131 | AY228768 | EU739236 | AY082415 | KJ454780 |
| *Streptopelia decaocto* | AF353398 | GU571632 | AF353418 | NA | NA | NA | AF353449 | NA |
| *Columbina inca* | AF182683 | DQ433529 | KJ645746 | NA | NA | NA | KJ668696 | NA |
| *Zenaida asiatica* | AF251533 | JQ176674 | AF251544 | NA | NA | NA | AF258324 | NA |
| *Zenaida macroura* | NC_031863 | HM033982 | AF251536 | AF076379 | EF373530 | NA | AF258321 | NA |
| *Geococcyx californianus* | NC_011711 | JN801317 | NC_011711 | NC_011711 | NA | EU739259 | AY695224 | EU739970 |
| *Chordeiles acutipennis* | GU586663 | DQ432851 | NA | NA | DQ482629 | NA | NA | NA |
| *Chordeiles minor* | EU166983 | DQ434540 | EU166924 | AF076349 | NA | NA | AY695137 | NA |
| *Phalaenoptilus nuttallii* | GU586684 | DQ433918 | NA | NA | DQ482626 | NA | NA | NA |
| *Aeronautes saxatalis* | EU166978 | DQ433288 | GU166847 | NA | NA | NA | GU166838 | NA |
| *Archilochus alexandri* | NA | DQ433322 | EU042529 | NA | NA | NA | EU042365 | NA |
| *Selasphorus platycercus* | AY275864 | DQ434064 | AY830522 | NA | NA | NA | AY830673 | NA |
| *Selasphorus rufus* | NA | DQ434066 | EU042590 | NA | NA | NA | EU042425 | NA |
| *Porzana carolina* | DQ485909 | DQ433993 | NA | NA | KC613958 | NA | KC613899 | NA |
| *Gallinula galeata* | EF681989 | JF498859 | NA | NA | NA | NA | NA | NA |
| *Fulica americana* | DQ485910 | DQ434598 | EU166956 | AF076355 | KC613923 | NA | AY695244 | NA |
| *Himantopus mexicanus* | DQ385217 | AY666255 | DQ385081 | DQ385098 | AY228795 | NA | AY695203 | NA |
| *Recurvirostra americana* | DQ485891 | AY666379 | EF373262 | NA | AY228800 | NA | AY695202 | NA |
| *Charadrius vociferus* | DQ485890 | AY666173 | DQ385082 | DQ385099 | AF143736 | EU739228 | AY695205 | EU739938 |
| *Bartramia longicauda* | EF373122 | AY666283 | EF373226 | NA | EF373171 | NA | NA | NA |
| *Numenius americanus* | JQ963052 | AY666560 | JQ963031 | NA | JQ963012 | NA | NA | NA |
| *Calidris minutilla* | KC969164 | AY666272 | KC969102 | NA | KC969128 | NA | NA | JQ252743 |
| *Calidris melanotos* | KC969162 | AY666264 | KC969100 | NA | KC969126 | NA | NA | AY339077 |
| *Calidris mauri* | KC969161 | AY666261 | KC969099 | NA | KC969125 | NA | NA | JQ252718 |
| *Limnodromus scolopaceus* | AF285819 | GQ482057 | EF373248 | NA | AY228774 | NA | AY695183 | NA |
| *Gallinago delicata* | FJ603651 | AY666304 | JQ963020 | NA | JQ963001 | NA | NA | NA |
| *Actitis macularius* | AY894231 | DQ434247 | AY894180 | NA | AY894214 | NA | AY695182 | NA |
| *Tringa solitaria* | AY894235 | AY666199 | AY894184 | NA | KC969147 | NA | NA | NA |
| *Tringa flavipes* | AY894227 | FJ028454 | AY894176 | NA | KC969142 | NA | NA | NA |
| *Tringa melanoleuca* | AF285820 | AY666263 | AY894181 | NA | AY228779 | NA | AY695181 | NA |
| *Phalaropus tricolor* | AY894240 | AY666195 | AY894189 |  | AY228778 | NA | AY695184 |  |
| *Larus delawarensis* | FM209909 | DQ433747 | AY631363 | NA | NA | NA | NA | NA |
| *Phalacrocorax brasilianus* | NC_029758 | FJ028009 | NC_029758 | NC_029758 | NA | NA | KM066280 | NA |
| *Phalacrocorax auritus* | AF373590 | DQ433896 | KM066483 | AF373589 | NA | NA | AY695211 | NA |
| *Pelecanus erythrorhynchos* | U08938 | DQ433889 | JX683963 | NA | KT954394 | NA | AY695217 | NA |
| *Ardea herodias* | AF193821 | DQ433329 | KX083606 | NA | NA | EU739212 | AY695234 | EU739921 |
| *Ardea alba* | AF193822 | FJ027162 | NA | NA | NA | NA | JQ910181 | NA |
| *Egretta thula* | AF193826 | FJ027526 | NA | NA | NA | NA | AY695237 | NA |
| *Bubulcus ibis* | DQ485898 | NA | NA | NC_025917 | NA | NA | NA | NA |
| *Butorides virescens* | AF193827 | DQ433392 | NA | NA | NA | NA | AY695232 | NA |
| *Nycticorax nycticorax* | JN018412 | JF498878 | JN018412 | NC_015807 | NA | NA | NA | NA |
| *Plegadis chihi* | NA | FJ028118 | NA | NA | NA | NA | AY695215 | NA |
| *Cathartes aura* | AY463690 | AY666510 | AY463690 | AY463690 | EF078766 | EU739225 | EF552757 | EU739935 |
| *Pandion haliaetus* | EU167008 | AB843647 | AY987051 | NC_008550 | EF078706 | EU739289 | AY987162 | EU740003 |
| *Elanus leucurus* | AY987233 | FJ027543 | AY987052 | NA | NA | NA | AY987163 | NA |
| *Ictinia mississippiensis* | GQ264821 | FJ027682 | EU583285 | NA | NA | GQ265060 | NA | NA |
| *Circus hudsonius* | NA | NA | NA | NA | KF437491 | KP857762 | NA | NA |
| *Accipiter striatus* | U83305 | DQ434244 | KM875999 | NA | NA | NA | NA | KM875875 |
| *Accipiter cooperii* | AY987308 | DQ433275 | AY987130 | NA | NA | NA | AY987211 | NA |
| *Buteogallus anthracinus* | GQ264779 | DQ432785 | GQ264863 | NA | EF078720 | GQ265020 | AY987223 | NA |
| *Parabuteo unicinctus* | GQ264853 | AY666176 | AY987153 | NA | EF078752 | GQ265082 | NA | NA |
| *Buteo swainsoni* | GQ264807 | DQ433391 | AY870892 | NA | NA | GQ265046 | EU583238 | NA |
| *Buteo albonotatus* | GQ264775 | DQ432782 | GQ264861 | NA | NA | GQ265016 | NA | NA |
| *Buteo jamaicensis* | GQ264784 | DQ434504 | AY987156 | AF076298 | AY461394 | GQ265026 | AY695173 | EU739907 |
| *Buteo regalis* | GQ264803 | DQ433390 | EU583283 | NA | NA | GQ265042 | EU583235 | NA |
| *Tyto alba* | EU410491 | JF498905 | EU601052 | EU601014 | KT954401 | EU739339 | AY082407 | EU740055 |
| *Bubo virginianus* | AB741544 | AY666514 | EU601050 | EU601012 | EU348893 | NA | NA | EU601092 |
| *Athene cunicularia* | KJ456202 | FJ027205 | KJ455332 | NA | EU348871 | EU739325 | EU739490 | EU740041 |
| *Asio otus* | AF082067.2 | AB843367 | EU601055 | EU601018 | EU348876 | NA | NA | EU601097 |
| *Asio flammeus* | NC_027606 | DQ433332 | NC_027606 | NC_027606 | AF294657 | NA | DQ881944 | AY233366 |
| *Megaceryle alcyon* | EU166985 | DQ433478 | DQ111842 | AY998959 | DQ111803 | NA | AY695158 | DQ640794 |
| *Sphyrapicus thyroideus* | NA | DQ434120 | KT455646 | NA | NA | NA | KT455671 | KT455689 |
| *Sphyrapicus varius* | U89193 | DQ434123 | JF909891 | KC813265 | NA | JF899879 | AF240020 | KT455690 |
| *Sphyrapicus nuchalis* | DQ479256 | HM033806 | DQ479166 | NA | NA | NA | DQ479225 | NA |
| *Picoides scalaris* | AF389326 | DQ433955 | NA | NA | NA | KR049371 | AF394329 | KR049439 |
| *Colaptes auratus* | KT455623 | DQ434554 | DQ479176 | GU566543 | NA | KC813369 | AY082398 | KT455676 |
| *Falco sparverius* | NC_008547 | DQ432928 | NC_008547 | NC_008547 | AY461400 | NA | AY695162 | KM875959 |
| *Falco columbarius* | NC_025579 | DQ434594 | KM876094 | NC_025579 | EU233170 | JF899884 | NA | KM875965 |
| *Falco peregrinus* | NC_000878 | AB843505 | NC_000878 | NC_000878 | AY461399 | NA | NA | KM875980 |
| *Falco mexicanus* | EU233076 | AY666553.2 | KM876046 | NA | EF078767 | EU739254 | EU739414 | EU739964 |
| *Contopus cooperi* | AF447605 | DQ433538 | AF447632 | NA | NA | NA | NA | NA |
| *Contopus sordidulus* | AF447607 | HM033309 | AF447635 | NA | NA | NA | NA | EU231829 |
| *Empidonax traillii* | AF297246 | DQ433622 | AY143230 | AY143257 | NA | NA | NA | NA |
| *Empidonax minimus* | AY030104 | DQ434592 | AY030125 | DQ294413 | NA | DQ294456 | NA | NA |
| *Empidonax hammondii* | AY143194 | DQ433617 | AY143221 | AY143248 | NA | NA | NA | NA |
| *Empidonax wrightii* | AY143207 | DQ433624 | AY143233 | AY143262 | FJ501629 | NA | NA | NA |
| *Empidonax oberholseri* | AY143198 | KT806381 | AY143225 | AY143253 | NA | NA | NA | NA |
| *Empidonax occidentalis* | AY143201 | DQ432914 | AY143227 | AY143255 | NA | NA | NA | NA |
| *Sayornis nigricans* | AF447612 | DQ434059 | AF447639 | AF447666 | FJ501742 | NA | NA | EU231826 |
| *Sayornis phoebe* | AF447614 | DQ434060 | AF447641 | AF447667 | NA | NA | NA | NA |
| *Sayornis saya* | AF447616 | AY666216 | AF447643 | AF447670 | NA | NA | NA | NA |
| *Pyrocephalus rubinus* | KT319368 | FJ028194 | KT319301 | JQ288181 | FJ501733 | KT319580 | NA | EU231818 |
| *Myiarchus cinerascens* | JQ004298 | DQ433826 | JQ004349 | NA | NA | NA | JN835380 | NA |
| *Tyrannus melancholicus* | DQ294532 | FJ028525 | DQ294576 | DQ294445 | NA | DQ294488 | AY489417 | AY529940 |
| *Tyrannus verticalis* | NA | DQ434211 | NA | NA | NA | NA | NA | NA |
| *Lanius ludovicianus* | AY030105 | AY666394 | AY030126 | AY030152 | AY057000 | NA | NA | NA |
| *Vireo bellii* | U12304 | AY666361 | KM262751 | NA | NA | NA | NA | NA |
| *Vireo cassinii* | AF081978 | HM033912 | KM115293 | NA | NA | NA | NA | NA |
| *Vireo solitarius* | AF081963 | HM033949 | AY030137 | AY030157 | NA | NA | NA | NA |
| *Vireo plumbeus* | AF081999 | NA | KM115391 | NA | NA | NA | NA | NA |
| *Vireo gilvus* | AY030111 | DQ434806 | AY030135 | AY030156 | NA | NA | NA | NA |
| *Cyanocitta stelleri* | AY030113 | HM033312 | AY030139 | AY030159 | NA | NA | DQ912642 | NA |
| *Corvus brachyrhynchos* | AY030112 | AY666482 | AY030138 | AY030158 | NA | NA | DQ912652 | NA |
| *Corvus cryptoleucus* | AY527264 | DQ432871 | JQ023963 | JQ024036 | NA | NA | AY667441 | NA |
| *Tachycineta bicolor* | NC_020596 | DQ434776 | AY136590 | NC_020596 | NA | NA | NA | NA |
| *Tachycineta thalassina* | NC_020597 | JQ176352 | NC_020597 | NC_020597 | NA | NA | AY827407 | NA |
| *Stelgidopteryx serripennis* | AY825955 | DQ434770 | AY826011 | NA | AY320002 | NA | AY827410 | NA |
| *Riparia riparia* | AF074578 | GQ482615 | AY826015 | NA | NA | NA | AY827423 | GQ374445 |
| *Petrochelidon pyrrhonota* | AF074591 | AY666213 | AY826039 | NA | AY056997 | NA | NA | NA |
| *Petrochelidon fulva* | GU460235 | AY666456 | GU460300 | NA | NA | NA | GU460275 | NA |
| *Hirundo rustica* | DQ119526 | DQ434603 | DQ176542 | DQ402247 | AY443290 | GQ242045 | AY827432 | AY064258 |
| *Auriparus flaviceps* | AF347969 | DQ433342 | KF183822 | NA | AY319975 | EU680628 | NA | EU680579 |
| *Sitta canadensis* | U63402 | DQ434090 | DQ219776 | NA | KJ467109 | NA | NA | NA |
| *Sitta carolinensis* | NC_024870 | DQ434745 | EF108559 | NC_024870 | AY443332 | NA | AY082421 | NA |
| *Certhia americana* | DQ196364 | HM033300 | HQ644783 | NA | NA | NA | AY082420 | NA |
| *Salpinctes obsoletus* | AY352537 | DQ434057 | AY460227 | NA | NA | NA | NA | NA |
| *Catherpes mexicanus* | AY352522 | DQ433462 | AY460231 | NA | NA | NA | NA | NA |
| *Troglodytes aedon* | AY352547 | JQ943376 | AY460233 | GU816821 | AY057038 | JN677436 | NA | GU816943 |
| *Cistothorus palustris* | AY352524 | HM033305 | AY460234 | NA | NA | KM978169 | NA | NA |
| *Thryomanes bewickii* | AY352541 | HM033836 | AY460226 | NA | NA | NA | NA | NA |
| *Campylorhynchus brunneicapillus* | KU057376 | DQ433425 | KU057376 | KU057376 | NA | NA | NA | NA |
| *Polioptila caerulea* | AY352535 | DQ434726 | JX869865 | NA | AY443320 | NA | NA | NA |
| *Polioptila melanura* | AF027848 | DQ433988 | KC864498 | NA | NA | NA | NA | NA |
| *Regulus calendula* | AY894885 | HM033743 | AY329435 | NC_024866 | AY057028 | EU739315 | EU739480 | EU740031 |
| *Sialia sialis* | AY049488 | DQ434743 | AY049510 | NA | AY320001 | NA | AY049465 | GU358766 |
| *Sialia mexicana* | DQ463684 | DQ434074 | AY752359 | NA | NA | NA | AY082417 | NA |
| *Sialia currucoides* | AY752400 | DQ434069 | AY752358 | NA | NA | NA | NA | NA |
| *Catharus ustulatus* | EU619756 | HM033297 | AY049527 | GU816822 | AY443265 | KC693099 | AY049482 | GU358709 |
| *Catharus guttatus* | X74261 | HM033269 | AY049524 | NA | AY307184 | EF468342 | EF471863 | DQ466820 |
| *Turdus migratorius* | AF197835 | AY666254 | AY752353 | DQ911027 | KC789829 | NA | NA | EU154750 |
| *Toxostoma curvirostre* | AF287541 | AY666334 | AY758201 | NA | AY307213 | NA | NA | NA |
| *Toxostoma crissale* | AY239747 | NA | JN799683 | NA | NA | JN799757 | JN799724 | NA |
| *Oreoscoptes montanus* | AF130241 | DQ433859 | EF468206 | NA | AY307203 | EF468337 | EF471858 | NA |
| *Mimus polyglottos* | HM217187 | JF498875 | JN799664 | NA | NA | EF468333 | EF471854 | AF140885 |
| *Sturnus vulgaris* | NC_029360 | DQ434775 | EU551977 | GU816823 | DQ466812 | EF468318 | EF471838 | AY228322 |
| *Bombycilla cedrorum* | KJ909187 | DQ433349 | AY329411 | KJ909187 | FJ177356 | EF468341 | EF471862 | NA |
| *Phainopepla nitens* | AF285788 | DQ433895 | AY329432 | NA | AY319995 | NA | NA | NA |
| *Passer domesticus* | AY030117 | DQ434705 | EF449664 | AY030163 | EF568263 | NA | AY494571 | EF449710 |
| *Anthus rubescens* | KP671525 | DQ432731 | KP671565 | NA | NA | NA | NA | NA |
| *Haemorhous mexicanus* | NC_025610 | DQ434518 | EF467253 | JN715520 | EU165350 | KC292759 | KX109656 | NA |
| *Loxia curvirostra* | AY495386 | AY666331 | GU816852 | EU881013 | AY037856 | NA | AY494564 | AY228303 |
| *Spinus pinus* | EF530031 | DQ434511 | JN715422 | EU881008 | KM112986 | KC292765 | NA | NA |
| *Spinus psaltria* | NC_025627 | JN801282 | JN715423 | EU881055 | NA | NA | NA | EU878745 |
| *Spinus tristis* | KT221304 | DQ434514 | JN715427 | JN715518 | EU165352 | NA | NA | NA |
| *Pipilo chlorurus* | FJ547258 | JQ175863 | FJ547299 | AY138952 | KC007780 | KC007611 | NA | NA |
| *Pipilo maculatus* | FJ547259 | HM033670 | FJ547300 | NA | NA | NA | NA | NA |
| *Aimophila ruficeps* | FJ547272 | AY666227 | FJ547313 | NA | NA | NA | NA | NA |
| *Melozone fusca* | EF529937 | DQ433100 | AF290123 | NA | KC007781 | KC007612 | NA | NA |
| *Peucaea cassinii* | FJ547269 | DQ433291 | FJ547310 | NA | NA | NA | NA | NA |
| *Spizella passerina* | FJ547278 | AY666225 | FJ547319 | NA | KJ910331 | NA | NA | NA |
| *Spizella pallida* | FJ547279 | DQ434761 | FJ547320 | NA | NA | NA | NA | NA |
| *Spizella breweri* | AF118238 | DQ434135 | AF290121 | NA | NA | NA | NA | NA |
| *Spizella atrogularis* | HQ263417 | JN801377 | HQ263433 | NA | NA | NA | NA | NA |
| *Pooecetes gramineus* | DQ459508 | AY666296 | DQ459528 | NA | KC007775 | KC007606 | NA | NA |
| *Chondestes grammacus* | HQ263421 | DQ433505 | HQ263434 | NA | KC007776 | KC007607 | NA | NA |
| *Amphispiza bilineata* | FJ547280 | DQ433308 | FJ547321 | NA | NA | KC007608 | NA | NA |
| *Artemisiospiza nevadensis* | EF488738 | DQ433303 | DQ459536 | NA | NA | NA | NA | NA |
| *Calamospiza melanocorys* | FJ547281 | DQ433394 | FJ547322 | NA | KC007766 | KC007597 | NA | KC007682 |
| *Passerculus sandwichensis* | DQ459513 | DQ434701 | DQ459533 | AY585094 | KC007771 | KC007602 | NA | NA |
| *Ammodramus savannarum* | EF529934 | DQ432712 | AF290125 | NA | NA | NA | NA | NA |
| *Melospiza melodia* | EF529938 | DQ434663 | AF290122 | NA | KC789832 | NA | NA | NA |
| *Melospiza lincolnii* | DQ459515 | DQ434662 | DQ459535 | NA | KC007768 | KC007599 | NA | NA |
| *Melospiza georgiana* | DQ459514 | DQ434657 | DQ459534 | NA | NA | NA | NA | NA |
| *Zonotrichia leucophrys* | AF305752 | DQ434841 | KC007570 | AY138943 | KC007769 | NA | NA | NA |
| *Junco hyemalis* | KC007556 | DQ434618 | AF290124 | NA | KC007770 | KX461568 | NA | NA |
| *Icteria virens* | AF383028 | HM033481 | AF383144 | NA | KC007812 | GU932031 | NA | GU932352 |
| *Xanthocephalus xanthocephalus* | AF089067 | KF810935 | KC007584 | NA | KC007842 | KC007651 | NA | NA |
| *Sturnella magna* | GU215214 | AY666267 | FJ154662 | NA | KJ456151 | NA | NA | NA |
| *Sturnella neglecta* | EF529952 | AY666329 | AF290127 | NA | KC007847 | KC007656 | NA | NA |
| *Icterus bullockii* | EF529950 | DQ433690 | EF529839 | NA | NA | NA | AF498276 | NA |
| *Icterus parisorum* | AF089035 | DQ432953 | AF099347 | NA | AY056998 | KC007648 | NA | NA |
| *Agelaius phoeniceus* | EF177807 | DQ434250 | AF290134 | NC_018801 | NA | KC007654 | AY714390 | NA |
| *Molothrus aeneus* | NC_018806 | DQ433808 | AF109957 | NC_018806 | NA | NA | NA | NA |
| *Molothrus ater* | EF529951 | DQ434680 | EF529840 | NA | KC007859 | KC007668 | NA | NA |
| *Euphagus cyanocephalus* | NC_018827 | DQ433633 | AF109951 | NC_018827 | KC007857 | KC007666 | NA | NA |
| *Quiscalus mexicanus* | FJ389567 | DQ434038 | AF109954 | NA | KF810951 | NA | NA | NA |
| *Parkesia noveboracensis* | AF383001 | DQ434740 | AF383117 | NA | NA | GU931938 | NA | GU932259 |
| *Mniotilta varia* | AF383006 | DQ434679 | AF383122 | NA | KC007795 | GU931932 | NA | GU932253 |
| *Oreothlypis celata* | GU932417 | DQ434796 | AY030149 | AY030169 | KC007790 | GU932023 | NA | GU932344 |
| *Oreothlypis ruficapilla* | GU932421 | DQ434803 | AF256501 | NA | KJ456093 | GU932027 | NA | GU932348 |
| *Oreothlypis virginiae* | GU932422 | DQ434218 | KT963420 | NA | NA | GU932028 | NA | GU932349 |
| *Geothlypis tolmiei* | AF383029 | DQ434690 | AF383145 | NA | KC007801 | GU932001 | NA | GU932322 |
| *Geothlypis trichas* | AF383003 | DQ434601 | AF383119 | NA | KC007802 | GU932004 | NA | GU932325 |
| *Setophaga citrina* | EU815695 | DQ434826 | GU932085 | AY968998 | KJ910327 | GU931978 | NA | GU932299 |
| *Setophaga ruticilla* | AF383008 | AY666217 | AF383124 | AY969002 | KC007796 | EU815718 | NA | GU932298 |
| *Setophaga petechia* | AF382996 | DQ434577 | AF383112 | NA | NA | EU815710 | NA | GU932308 |
| *Setophaga pinus* | AF383027 | DQ433587 | AF383143 | NA | NA | EU815711 | NA | GU932310 |
| *Setophaga coronata* | AY030120 | HM033344 | AY030146 | AY030166 | KC007793 | GU931971 | NA | GU932292 |
| *Setophaga graciae* | EU815680 | DQ433573 | AY650198 | NA | NA | EU815703 | NA | GU932301 |
| *Setophaga nigrescens* | EU815683 | DQ433579 | AY650190 | NA | NA | EU815706 | NA | GU932304 |
| *Setophaga townsendi* | EU815690 | HM033443 | FJ374105 | NA | NA | EU815714 | NA | GU932315 |
| *Setophaga occidentalis* | EU815684 | DQ433584 | EU815770 | NA | NA | EU815707 | NA | GU932305 |
| *Cardellina pusilla* | GU932416 | DQ434829 | AY650220 | AY969000 | NA | NA | NA | GU932343 |
| *Myioborus pictus* | AF383011 | AF383091 | AY968938 | AY968991 | KC007808 | GU932016 | NA | GU932337 |
| *Piranga rubra* | AY649510 | JQ175881 | AF447300 | NA | KJ910325 | NA | NA | NA |
| *Piranga ludoviciana* | AY124545 | HM033674 | AF290109 | NA | JN810692 | JN810295 | NA | NA |
| *Cardinalis cardinalis* | EF530007 | DQ434510 | JF795738 | NC_025618 | AY056982 | JN810296 | KM112394 | NA |
| *Cardinalis sinuatus* | EF530009 | DQ432818 | EF529903 | NA | KM225024 | KC313673 | NA | NA |
| *Pheucticus melanocephalus* | EF530012 | HM033644 | EF529905 | NA | KM225023 | FJ010389 | NA | NA |
| *Passerina caerulea* | AF301448 | HM033638 | EF529882 | NA | KC007833 | KC007642 | NA | EU191803 |
| *Passerina ciris* | AF301458 | DQ433882 | EF529883 | NA | JN810691 | JN810294 | NA | NA |
